# Supplementary material
Source: publisher figshare collection journal article supplement (https://sage.figshare.com/ndownloader/files/22773650)
Supplement: Supplementary file 1 [file 22773650]

**Contents**

Appendix A. Experimental manipulation: Stimuli..... 2

Appendix B. Time spent reading the experimental stimulus by study and experimental condition..... 5

Appendix C. Simple experimental effects on Trump warmth and competence evaluations ..... 6

Appendix D. Experimental treatment effects on Trump-activated positive emotions ..... 10

Appendix E. Mediation model..... 11

Appendix F. Article evaluations ..... 13

## Appendix A. Experimental manipulation: Stimuli

Business Insider

TECH | FINANCE | POLITICS | STRATEGY | LIFE | ALL

PRIME

INTELLIGENCE



# Mueller reportedly interviewed Michael Cohen about aspects of Trump's dealings with Russia

Sep. 20, 2018, 4:25 PM





Michael Cohen. Flickr

Michael Cohen, President Donald Trump's former longtime lawyer, sat down with the special counsel Robert Mueller for hours of interviews spanning multiple sessions over the last month.

Mueller is said to have asked Cohen about every aspect of Trump's dealings — financial, political, and otherwise — with Russian interests.

The special counsel is tasked with investigating Russia's interference in the 2016 US election and whether members of the Trump campaign colluded with Moscow to tilt the race in his favor. Trump has strongly opposed the suggestion of collusion with Russia.

Trump took to Twitter to decry the Mueller investigation:



Donald J. Trump

@realDonaldTrump

The illegal Mueller Witch Hunt continues in search of a crime. There was never Collusion with Russia, except by the Clinton campaign, so the 17 Angry Democrats are looking at anything they can find. Very unfair and BAD for the country. ALSO, not allowed under the LAW!

3:20 PM - Sep 16, 2018

♡ 99.1K

💬 79.5K people are talking about this

Cohen pleaded guilty last month to eight counts of tax evasion, one count of bank fraud, and two counts related to campaign-finance violations. He is now cooperating with that investigation, as well as a separate New York state investigation into the Trump Organization.

But his sit-down with Mueller was entirely voluntary and did not include any promise of leniency on the part of prosecutors.

In addition to discussing Trump's business dealings and potential collusion with Russia, Mueller's team also reportedly asked Cohen whether Trump or any of his associates discussed the possibility of a pardon with Cohen.

That line of questioning would suggest the special counsel is continuing to gather new information as part of a parallel investigation into whether Trump sought to obstruct justice after the existence of the Russia investigation became public knowledge last year.

Donald Trump has spoken out on Twitter:



Donald J. Trump

@realDonaldTrump

Where's the Collusion? They made up a phony crime called Collusion, and when there was no Collusion they say there was Obstruction (of a phony crime that never existed). If you FIGHT BACK or say anything bad about the Rigged Witch Hunt, they scream Obstruction!

12:48 PM - Aug 20, 2018

♡ 94K

💬 56.7K people are talking about this

What does Cohen know?

Cohen is a key figure in several threads of the Russia investigation, including the creation of a Russia-friendly 'peace plan' during the early days of Trump's presidency, as well as an allegation that Cohen traveled to Prague during the summer of 2016 to meet with Kremlin-linked officials.

Last month, it also emerged that Cohen is said to have claimed that Trump knew in advance about a Russian lawyer's offer to the campaign of 'dirt' on the Democratic nominee Hillary Clinton in 2016.

Cohen's lawyer, Lanny Davis, later walked back that claim, however, saying he could not independently confirm it.

President Trump picked up on the point, posting on Twitter:



Donald J. Trump

@realDonaldTrump

Michaels Cohen's attorney clarified the record, saying his client does not know if President Trump knew about the Trump Tower meeting (out of which came nothing!). The answer is that I did NOT know about the meeting. Just another phony story by the Fake News Media!

1:16 PM - Aug 25, 2018

♡ 80.9K

💬 40.7K people are talking about this

More:

Russia investigation

Russia Newsletter

Michael Cohen

Fig A1. Screenshot of the Embedded Condition stimulus. During the experiment, the stimulus appeared to be a normal online news article; the above format is for ease of display in this context.

Sep. 20, 2018, 4:25 PM

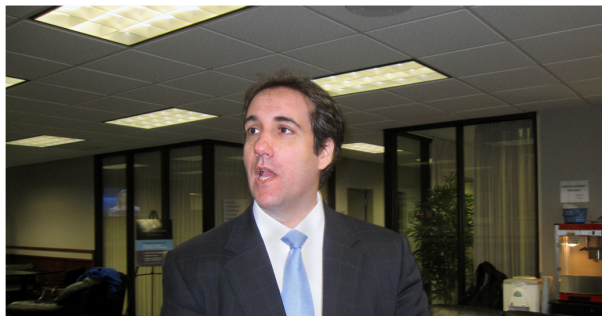

Michael Cohen, President Donald Trump's former longtime lawyer, sat down with the special counsel Robert Mueller for hours of interviews spanning multiple sessions over the last month.

The special counsel is tasked with investigating Russia's interference in the 2016 US election and whether members of the Trump campaign colluded with Moscow to tilt the race in his favor. Trump has strongly opposed the suggestion of collusion with Russia.

Trump took to Twitter to decry the Mueller investigation: "The illegal Mueller Witch Hunt continues in search of a crime. There was never Collusion with Russia, except by the Clinton campaign, so the 17 Angry Democrats are looking at anything they can find. Very unfair and BAD for the country. ALSO, not allowed under the LAW!"

Cohen pleaded guilty last month to eight counts of tax evasion, one count of bank fraud, and two counts related to campaign-finance violations. He is now cooperating with that investigation, as well as a separate New York state investigation into the Trump Organization.

But his sit-down with Mueller was entirely voluntary and did not include any promise of leniency on the part of prosecutors.

In addition to discussing Trump's business dealings and potential collusion with Russia, Mueller's team also reportedly asked Cohen whether Trump or any of his associates discussed the possibility of a pardon with Cohen.

That line of questioning would suggest the special counsel is continuing to gather new information as part of a parallel investigation into whether Trump sought to obstruct justice after the existence of the Russia investigation became public knowledge last year.

Donald Trump has spoken out on Twitter: "Where's the Collusion? They made up a phony crime called Collusion, and when there was no Collusion they say there was Obstruction (of a phony crime that never existed). If you FIGHT BACK or say anything bad about the Rigged Witch Hunt, they scream Obstruction!"

Cohen is a key figure in several threads of the Russia investigation, including the creation of a Russia-friendly 'peace plan' during the early days of Trump's presidency, as well as an allegation that Cohen traveled to Prague during the summer of 2016 to meet with Kremlin-linked officials.

Last month, it also emerged that Cohen is said to have claimed that Trump knew in advance about a Russian lawyer's offer to the campaign of 'dirt' on the Democratic nominee Hillary Clinton in 2016.

Cohen's lawyer, Lanny Davis, later walked back that claim, however, saying he could not independently confirm it.

President Trump picked up on the point, posting on Twitter: "Michaels Cohen's attorney clarified the record, saying his client does not know if President Trump knew about the Trump Tower meeting (out of which came nothing!). The answer is that I did NOT know about the meeting. Just another phony story by the Fake News Media!"

More: [Russia investigation](#) [Russia Newsletter](#) [Michael Cohen](#) 

Page 3 of 25

BUSINESS INSIDER

TECH | FINANCE | POLITICS | STRATEGY | LIFE | ALL

PRIME | INTELLIGENCE

Mueller reportedly interviewed Michael Cohen about aspects of Trump's dealings with Russia

Sep. 20, 2018, 4:25 PM

Michael Cohen. Flickr

Michael Cohen, President Donald Trump's former longtime lawyer, sat down with the special counsel Robert Mueller for hours of interviews spanning multiple sessions over the last month.

Mueller is said to have asked Cohen about every aspect of Trump's dealings — financial, political, and otherwise — with Russian interests.

The special counsel is tasked with investigating Russia's interference in the 2016 US election and whether members of the Trump campaign colluded with Moscow to tilt the race in his favor. Trump has strongly opposed the suggestion of collusion with Russia.

Trump took to Twitter to decry the Mueller investigation as an illegal witch-hunt and denied cooperation with Russians. Instead, he stated that the Clinton campaign were guilty of collusion and those Democrats on the special council are looking for incriminating evidence on others, something the President said is very unfair and bad for the country, as well as against the law.

Cohen pleaded guilty last month to eight counts of tax evasion, one count of bank fraud, and two counts related to campaign-finance violations. He is now cooperating with that investigation, as well as a separate New York state investigation into the Trump Organization.

But his sit-down with Mueller was entirely voluntary and did not include any promise of leniency on the part of prosecutors.

In addition to discussing Trump's business dealings and potential collusion with Russia, Mueller's team also reportedly asked Cohen whether Trump or any of his associates discussed the possibility of a pardon with Cohen.

That line of questioning would suggest the special counsel is continuing to gather new information as part of a parallel investigation into whether Trump sought to obstruct justice after the existence of the Russia investigation became public knowledge last year.

Donald Trump has spoken out on Twitter, asking where is the evidence of collusion before claiming that the alleged crime of collusion had been made up. Trump contested that when evidence failed to be found, his opponents switched to claiming he was guilty of obstruction of a crime that never existed. Trump riled against what he described as a rigged witch hunt, saying that if anyone challenges it they are accused of obstruction.

#### What does Cohen know?

Cohen is a key figure in several threads of the Russia investigation, including the creation of a Russia-friendly 'peace plan' during the early days of Trump's presidency, as well as an allegation that Cohen traveled to Prague during the summer of 2016 to meet with Kremlin-linked officials.

Last month, it also emerged that Cohen is said to have claimed that Trump knew in advance about a Russian lawyer's offer to the campaign of 'dirt' on the Democratic nominee Hillary Clinton in 2016.

Cohen's lawyer, Lanny Davis, later walked back that claim, however, saying he could not independently confirm it.

President Trump picked up on the point, posting on Twitter that Cohen's attorney had clarified that Cohen doesn't know if the President had knowledge of the Trump Tower meeting. Trump further stated that he did not know about the meeting and that, ultimately, nothing had come out of it before blaming what he described as the fake news media for the suggestion of impropriety.

More: [Russia investigation](#) [Russia Newsletter](#) [Michael Cohen](#) ▼

Fig A3. Screenshot of the Paraphrased Condition stimulus. During the experiment, the stimulus appeared to be a normal online news article; the above format is for ease of display in this context.

## Appendix B. Time spent reading the experimental stimulus by study and experimental condition

| Table B1. Time spent on stimulus and reading speed rates |                                      |                                       |                                          |                                      |                                       |                                          |
|----------------------------------------------------------|--------------------------------------|---------------------------------------|------------------------------------------|--------------------------------------|---------------------------------------|------------------------------------------|
|                                                          | Republican Experiment                |                                       |                                          | Democrat Experiment                  |                                       |                                          |
|                                                          | Embedded<br>condition<br>(540 words) | Quotation<br>condition<br>(492 words) | Paraphrasing<br>condition<br>(526 words) | Embedded<br>condition<br>(540 words) | Quotation<br>condition<br>(492 words) | Paraphrasing<br>condition<br>(526 words) |
| Time spent on stimulus<br>(in seconds)                   |                                      |                                       |                                          |                                      |                                       |                                          |
| Median                                                   | 140.00                               | 160.00                                | 139.00                                   | 130.00                               | 118.00                                | 147.00                                   |
| Mean                                                     | 159.69                               | 177.45                                | 166.10                                   | 142.54                               | 139.10                                | 161.07                                   |
| <i>Sd</i>                                                | 92.42                                | 84.89                                 | 81.49                                    | 56.94                                | 71.14                                 | 61.59                                    |
| Reading speed rate<br>(in words per minute)              |                                      |                                       |                                          |                                      |                                       |                                          |
| Median                                                   | 231.43                               | 184.51                                | 227.05                                   | 249.23                               | 250.17                                | 214.70                                   |
| Mean                                                     | 237.55                               | 203.04                                | 220.12                                   | 260.67                               | 312.48                                | 219.99                                   |
| <i>Sd</i>                                                | 76.09                                | 138.54                                | 73.02                                    | 120.28                               | 448.68                                | 68.93                                    |
| N                                                        | 100                                  | 98                                    | 77                                       | 59                                   | 79                                    | 72                                       |

## Appendix C. Simple experimental effects on Trump warmth and competence evaluations

Note: To ensure we ran the correct analyses, we first checked the distribution of residuals in both cases. The results from the Shapiro-Wilk test showed no deviations from normality for Republicans, but highly significant deviations for Democrats ( $W=0.703$ ,  $p=0.000$  for warmth ratings, and  $W=0.827$ ,  $p=0.000$  for competence ratings). Upon further inspection, because high proportions (i.e., between 64% and 77%) of Democrats in all conditions rated Trump on both variables at the lowest point, zero, we recoded the Trump ratings as binary, with “1” meaning “some warmth/competence” and “0” meaning “no warmth/competence”. The tables below present the results from the regression analysis for Republicans and the logit regression analysis for Democrats (both with bootstrapped standard errors over 1000 replications).

| Table C-R1. Dependent Variable: Trump Warmth Rating (0-10) (Republican-Only Sample) |                    |                        |        |       |                            |        |
|-------------------------------------------------------------------------------------|--------------------|------------------------|--------|-------|----------------------------|--------|
|                                                                                     | Observed<br>Coeff. | Bootstrap<br>Std. Err. | z      | p>  z | 95% Confidence<br>Interval |        |
| Condition                                                                           |                    |                        |        |       |                            |        |
| QC                                                                                  | 0.301              | 0.358                  | 0.840  | 0.400 | -0.400                     | 1.003  |
| EC                                                                                  | 0.663              | 0.346                  | 1.920  | 0.055 | -0.015                     | 1.341  |
|                                                                                     |                    |                        |        |       |                            |        |
| Republican Identity: Strong                                                         | 1.035              | 0.345                  | 3.000  | 0.003 | 0.359                      | 1.711  |
| Collusion: Own Opinion                                                              | -0.501             | 0.076                  | -6.570 | 0.000 | -0.650                     | -0.352 |
| Mueller Approval                                                                    | -0.537             | 0.172                  | -3.120 | 0.002 | -0.874                     | -0.200 |
| Education                                                                           | -0.098             | 0.121                  | -0.810 | 0.419 | -0.336                     | 0.140  |
| Female                                                                              | 0.055              | 0.315                  | 0.180  | 0.861 | -0.562                     | 0.672  |
| Age                                                                                 | 0.025              | 0.011                  | 2.350  | 0.019 | 0.004                      | 0.046  |
| Twitter Weekly News<br>Consumption                                                  | 0.266              | 0.072                  | 3.680  | 0.000 | 0.124                      | 0.408  |
| Constant                                                                            | 6.797              | 0.901                  | 7.540  | 0.000 | 5.031                      | 8.563  |
|                                                                                     |                    |                        |        |       |                            |        |
| Wald chi <sup>2</sup> (9)                                                           | 323.38             |                        |        |       |                            |        |
| Prob > chi <sup>2</sup>                                                             | 0.000              |                        |        |       |                            |        |
| Adjusted R <sup>2</sup>                                                             | 0.521              |                        |        |       |                            |        |
| N                                                                                   | 237                |                        |        |       |                            |        |
| Bootstrap Replications                                                              | 1000               |                        |        |       |                            |        |
| Note: Linear regression results computed with Stata 14.                             |                    |                        |        |       |                            |        |

| Table B-R1a. Predicted Margins for Trump Warmth Rating by Experimental Condition                |        |                           |        |       |                            |       |
|-------------------------------------------------------------------------------------------------|--------|---------------------------|--------|-------|----------------------------|-------|
|                                                                                                 | Margin | Delta-method<br>Std. Err. | z      | p>  z | 95% Confidence<br>Interval |       |
| Condition                                                                                       |        |                           |        |       |                            |       |
| PC                                                                                              | 5.545  | 0.265                     | 20.910 | 0.000 | 5.025                      | 6.065 |
| QC                                                                                              | 5.846  | 0.245                     | 23.820 | 0.000 | 5.365                      | 6.328 |
| EC                                                                                              | 6.208  | 0.232                     | 26.720 | 0.000 | 5.752                      | 6.663 |
| Note: Margins computed with Stata 14 with 1000 Bootstrap replications. N=237 (Republicans only) |        |                           |        |       |                            |       |

| Table C-R2. Dependent Variable: Trump Competence Rating (0-10) (Republican-Only Sample) |                    |                        |        |       |                            |        |
|-----------------------------------------------------------------------------------------|--------------------|------------------------|--------|-------|----------------------------|--------|
|                                                                                         | Observed<br>Coeff. | Bootstrap<br>Std. Err. | z      | p>  z | 95% Confidence<br>Interval |        |
| Condition                                                                               |                    |                        |        |       |                            |        |
| QC                                                                                      | 0.133              | 0.368                  | 0.360  | 0.718 | -0.588                     | 0.854  |
| EC                                                                                      | 0.426              | 0.349                  | 1.220  | 0.222 | -0.258                     | 1.109  |
|                                                                                         |                    |                        |        |       |                            |        |
| Republican Identity: Strong                                                             | 0.962              | 0.327                  | 2.950  | 0.003 | 0.322                      | 1.602  |
| Collusion: Own Opinion                                                                  | -0.410             | 0.078                  | -5.270 | 0.000 | -0.563                     | -0.258 |
| Mueller Approval                                                                        | -0.491             | 0.174                  | -2.820 | 0.005 | -0.833                     | -0.150 |
| Education                                                                               | -0.088             | 0.120                  | -0.730 | 0.463 | -0.323                     | 0.147  |
| Female                                                                                  | 0.217              | 0.317                  | 0.690  | 0.493 | -0.404                     | 0.839  |
| Age                                                                                     | 0.034              | 0.010                  | 3.320  | 0.001 | 0.014                      | 0.054  |
| Twitter Weekly News<br>Consumption                                                      | 0.198              | 0.066                  | 2.980  | 0.003 | 0.068                      | 0.328  |
| Constant                                                                                | 6.692              | 0.839                  | 7.980  | 0.000 | 5.048                      | 8.336  |
|                                                                                         |                    |                        |        |       |                            |        |
| Wald chi <sup>2</sup> (9)                                                               | 212.39             |                        |        |       |                            |        |
| Prob > chi <sup>2</sup>                                                                 | 0.000              |                        |        |       |                            |        |
| Adjusted R <sup>2</sup>                                                                 | 0.4570             |                        |        |       |                            |        |
| N                                                                                       | 237                |                        |        |       |                            |        |
| Bootstrap Replications                                                                  | 1000               |                        |        |       |                            |        |
| Note: Linear regression results computed with Stata 14.                                 |                    |                        |        |       |                            |        |

| Table B-R2a. Predicted Margins for Trump Competence Rating by Experimental Condition            |        |                           |        |       |                            |       |
|-------------------------------------------------------------------------------------------------|--------|---------------------------|--------|-------|----------------------------|-------|
|                                                                                                 | Margin | Delta-method<br>Std. Err. | z      | p>  z | 95% Confidence<br>Interval |       |
| Condition                                                                                       |        |                           |        |       |                            |       |
| PC                                                                                              | 6.121  | 0.259                     | 23.680 | 0.000 | 5.614                      | 6.628 |
| QC                                                                                              | 6.254  | 0.251                     | 24.910 | 0.000 | 5.762                      | 6.746 |
| EC                                                                                              | 6.547  | 0.241                     | 27.150 | 0.000 | 6.074                      | 7.020 |
| Note: Margins computed with Stata 14 with 1000 Bootstrap replications. N=237 (Republicans only) |        |                           |        |       |                            |       |

| Table C-D1. Dependent Variable: Trump Warmth Rating (0-1) (Democrat-Only Sample) |                          |                        |        |       |                            |          |
|----------------------------------------------------------------------------------|--------------------------|------------------------|--------|-------|----------------------------|----------|
|                                                                                  | Observed<br>Odd<br>Ratio | Bootstrap<br>Std. Err. | z      | p>  z | 95% Confidence<br>Interval |          |
| Condition                                                                        |                          |                        |        |       |                            |          |
| QC                                                                               | 0.876                    | 0.468                  | -0.250 | 0.804 | 0.307                      | 2.498    |
| EC                                                                               | 1.511                    | 0.885                  | 0.700  | 0.481 | 0.479                      | 4.760    |
|                                                                                  |                          |                        |        |       |                            |          |
| Democrat Identity: Strong                                                        | 0.371                    | 0.185                  | -1.990 | 0.047 | 0.139                      | 0.987    |
| Collusion: Own Opinion                                                           | 0.658                    | 0.087                  | -3.170 | 0.002 | 0.508                      | 0.852    |
| Mueller Approval                                                                 | 0.879                    | 0.299                  | -0.380 | 0.704 | 0.450                      | 1.714    |
| Education                                                                        | 0.744                    | 0.168                  | -1.310 | 0.189 | 0.478                      | 1.157    |
| Female                                                                           | 0.658                    | 0.294                  | -0.940 | 0.349 | 0.274                      | 1.579    |
| Age                                                                              | 0.971                    | 0.021                  | -1.360 | 0.174 | 0.930                      | 1.013    |
| Twitter Weekly News<br>Consumption                                               | 1.150                    | 0.104                  | 1.550  | 0.122 | 0.963                      | 1.373    |
| Constant                                                                         | 181.165                  | 254.179                | 3.710  | 0.000 | 11.583                     | 2833.524 |
|                                                                                  |                          |                        |        |       |                            |          |
| Log Likelihood                                                                   | -79.840                  |                        |        |       |                            |          |
| Wald chi²(9)                                                                     | 27.77                    |                        |        |       |                            |          |
| Prob > chi²                                                                      | 0.001                    |                        |        |       |                            |          |
| Pseudo R²                                                                        | 0.196                    |                        |        |       |                            |          |
| N                                                                                | 177                      |                        |        |       |                            |          |
| Bootstrap Replications                                                           | 1000                     |                        |        |       |                            |          |
| Note: Logistic regression results computed with Stata 14.                        |                          |                        |        |       |                            |          |

| Table C-D1a. Predicted Margins for Trump Warmth Rating by Experimental Condition              |        |                           |       |       |                            |       |
|-----------------------------------------------------------------------------------------------|--------|---------------------------|-------|-------|----------------------------|-------|
|                                                                                               | Margin | Delta-method<br>Std. Err. | z     | p>  z | 95% Confidence<br>Interval |       |
| Condition                                                                                     |        |                           |       |       |                            |       |
| PC                                                                                            | 0.240  | 0.055                     | 4.370 | 0.000 | 0.132                      | 0.347 |
| QC                                                                                            | 0.222  | 0.051                     | 4.320 | 0.000 | 0.121                      | 0.322 |
| EC                                                                                            | 0.303  | 0.071                     | 4.260 | 0.000 | 0.164                      | 0.442 |
| Note: Margins computed with Stata 14 with 1000 Bootstrap replications. N=177 (Democrats only) |        |                           |       |       |                            |       |



| Table C-D2. Dependent Variable: Trump Competence Rating (0-1) (Democrat-Only Sample) |                          |                        |        |       |                            |         |
|--------------------------------------------------------------------------------------|--------------------------|------------------------|--------|-------|----------------------------|---------|
|                                                                                      | Observed<br>Odd<br>Ratio | Bootstrap<br>Std. Err. | z      | p>  z | 95% Confidence<br>Interval |         |
| Condition                                                                            |                          |                        |        |       |                            |         |
| QC                                                                                   | 0.568                    | 0.263                  | -1.220 | 0.222 | 0.229                      | 1.407   |
| EC                                                                                   | 1.084                    | 0.549                  | 0.160  | 0.874 | 0.402                      | 2.923   |
|                                                                                      |                          |                        |        |       |                            |         |
| Democrat Identity: Strong                                                            | 0.469                    | 0.207                  | -1.720 | 0.086 | 0.197                      | 1.114   |
| Collusion: Own Opinion                                                               | 0.741                    | 0.079                  | -2.820 | 0.005 | 0.601                      | 0.913   |
| Mueller Approval                                                                     | 0.818                    | 0.203                  | -0.810 | 0.417 | 0.503                      | 1.330   |
| Education                                                                            | 0.985                    | 0.188                  | -0.080 | 0.937 | 0.678                      | 1.431   |
| Female                                                                               | 0.845                    | 0.336                  | -0.420 | 0.673 | 0.387                      | 1.844   |
| Age                                                                                  | 1.006                    | 0.018                  | 0.340  | 0.737 | 0.971                      | 1.043   |
| Twitter Weekly News<br>Consumption                                                   | 1.167                    | 0.091                  | 1.990  | 0.047 | 1.002                      | 1.360   |
| Constant                                                                             | 15.052                   | 18.539                 | 2.200  | 0.028 | 1.346                      | 168.271 |
|                                                                                      |                          |                        |        |       |                            |         |
| Log Likelihood                                                                       | -97.280                  |                        |        |       |                            |         |
| Wald chi <sup>2</sup> (9)                                                            | 18.50                    |                        |        |       |                            |         |
| Prob > chi <sup>2</sup>                                                              | 0.030                    |                        |        |       |                            |         |
| Pseudo R <sup>2</sup>                                                                | 0.125                    |                        |        |       |                            |         |
| N                                                                                    | 177                      |                        |        |       |                            |         |
| Bootstrap Replications                                                               | 1000                     |                        |        |       |                            |         |
| Note: Logistic regression results computed with Stata 14.                            |                          |                        |        |       |                            |         |

| Table C-D2a. Predicted Margins for Trump Competence Rating by Experimental Condition          |        |                           |       |       |                            |       |
|-----------------------------------------------------------------------------------------------|--------|---------------------------|-------|-------|----------------------------|-------|
|                                                                                               | Margin | Delta-method<br>Std. Err. | z     | p>  z | 95% Confidence<br>Interval |       |
| Condition                                                                                     |        |                           |       |       |                            |       |
| PC                                                                                            | 0.359  | 0.063                     | 5.700 | 0.000 | 0.236                      | 0.483 |
| QC                                                                                            | 0.257  | 0.054                     | 4.800 | 0.000 | 0.152                      | 0.362 |
| EC                                                                                            | 0.375  | 0.075                     | 5.000 | 0.000 | 0.228                      | 0.522 |
| Note: Margins computed with Stata 14 with 1000 Bootstrap replications. N=177 (Democrats only) |        |                           |       |       |                            |       |

## Appendix D. Experimental treatment effects on Trump-activated positive emotions

| Table D-R1. Dependent Variable: Trump-Activated Positive Emotions (Yes/No) (Republican-Only Sample) |                          |                        |        |       |                            |       |
|-----------------------------------------------------------------------------------------------------|--------------------------|------------------------|--------|-------|----------------------------|-------|
|                                                                                                     | Observed<br>Odd<br>Ratio | Bootstrap<br>Std. Err. | z      | P>  z | 95% Confidence<br>Interval |       |
| Condition                                                                                           |                          |                        |        |       |                            |       |
| QC                                                                                                  | 1.465                    | 0.581                  | 0.960  | 0.336 | 0.673                      | 3.188 |
| EC                                                                                                  | 2.194                    | 0.875                  | 1.970  | 0.049 | 1.003                      | 4.796 |
|                                                                                                     |                          |                        |        |       |                            |       |
| Republican Identity: Strong                                                                         | 1.457                    | 0.518                  | 1.060  | 0.290 | 0.726                      | 2.923 |
| Collusion: Own Opinion                                                                              | 0.860                    | 0.069                  | -1.870 | 0.062 | 0.735                      | 1.007 |
| Mueller Approval                                                                                    | 0.724                    | 0.130                  | -1.800 | 0.072 | 0.510                      | 1.029 |
| Education                                                                                           | 1.053                    | 0.135                  | 0.400  | 0.686 | 0.819                      | 1.355 |
| Female                                                                                              | 0.533                    | 0.178                  | -1.880 | 0.060 | 0.277                      | 1.027 |
| Age                                                                                                 | 1.021                    | 0.013                  | 1.620  | 0.106 | 0.996                      | 1.047 |
| Twitter Weekly News<br>Consumption                                                                  | 1.065                    | 0.079                  | 0.850  | 0.397 | 0.921                      | 1.231 |
| Constant                                                                                            | 0.720                    | 0.648                  | -0.360 | 0.715 | 0.123                      | 4.203 |
|                                                                                                     |                          |                        |        |       |                            |       |
| Log likelihood                                                                                      | -139.616                 |                        |        |       |                            |       |
| Wald chi <sup>2</sup> (9)                                                                           | 32.850                   |                        |        |       |                            |       |
| Prob > chi <sup>2</sup>                                                                             | 0.0001                   |                        |        |       |                            |       |
| Pseudo R <sup>2</sup>                                                                               | 0.147                    |                        |        |       |                            |       |
| N                                                                                                   | 237                      |                        |        |       |                            |       |
| Bootstrap Replications                                                                              | 1000                     |                        |        |       |                            |       |
| Note: Logistic regression results computed with Stata 14.                                           |                          |                        |        |       |                            |       |

| Predicted Probabilities “Trump-Activated Positive Emotions”=Yes by Condition                    |        |                           |       |       |                            |       |
|-------------------------------------------------------------------------------------------------|--------|---------------------------|-------|-------|----------------------------|-------|
|                                                                                                 | Margin | Delta-method<br>Std. Err. | z     | p>  z | 95% Confidence<br>Interval |       |
| Condition                                                                                       |        |                           |       |       |                            |       |
| PC                                                                                              | 0.378  | 0.058                     | 6.500 | 0.000 | 0.264                      | 0.492 |
| QC                                                                                              | 0.454  | 0.054                     | 8.490 | 0.000 | 0.349                      | 0.559 |
| EC                                                                                              | 0.537  | 0.054                     | 9.930 | 0.000 | 0.431                      | 0.643 |
| Note: Margins computed with Stata 14 with 1000 Bootstrap replications. N=237 (Republicans only) |        |                           |       |       |                            |       |

## Appendix E. Mediation model

| Table E-R1. Mediation Model: Experimental Conditions → Trump-Activated Positive Emotions → Trump Warmth Rating (Republican-Only Sample) |                    |                        |        |       |                            |        |
|-----------------------------------------------------------------------------------------------------------------------------------------|--------------------|------------------------|--------|-------|----------------------------|--------|
| Dependent Variable: Trump-Activated Positive Emotions (Yes/No)                                                                          |                    |                        |        |       |                            |        |
| Logit Regression Results                                                                                                                |                    |                        |        |       |                            |        |
|                                                                                                                                         | Observed<br>Coeff. | Bootstrap<br>Std. Err. | z      | p>  z | 95% Confidence<br>Interval |        |
| Condition                                                                                                                               |                    |                        |        |       |                            |        |
| QC                                                                                                                                      | 0.382              | 0.399                  | 0.960  | 0.339 | -0.400                     | 1.163  |
| EC                                                                                                                                      | 0.786              | 0.400                  | 1.960  | 0.049 | 0.002                      | 1.569  |
|                                                                                                                                         |                    |                        |        |       |                            |        |
| Republican Identity: Strong                                                                                                             | 0.376              | 0.371                  | 1.010  | 0.311 | -0.351                     | 1.103  |
| Collusion: Own Opinion                                                                                                                  | -0.150             | 0.082                  | -1.830 | 0.068 | -0.312                     | 0.011  |
| Mueller Approval                                                                                                                        | -0.323             | 0.188                  | -1.720 | 0.086 | -0.691                     | 0.045  |
| Education                                                                                                                               | 0.052              | 0.136                  | 0.380  | 0.702 | -0.214                     | 0.318  |
| Female                                                                                                                                  | -0.629             | 0.337                  | -1.870 | 0.062 | -1.290                     | 0.032  |
| Age                                                                                                                                     | 0.021              | 0.013                  | 1.630  | 0.103 | -0.004                     | 0.045  |
| Twitter Weekly News<br>Consumption                                                                                                      | 0.063              | 0.074                  | 0.850  | 0.395 | -0.082                     | 0.207  |
| Constant                                                                                                                                | -0.328             | 0.952                  | -0.340 | 0.730 | -2.195                     | 1.538  |
|                                                                                                                                         |                    |                        |        |       |                            |        |
| Dependent Variable: Trump Warmth Rating (0-10)                                                                                          |                    |                        |        |       |                            |        |
| Linear Regression Results                                                                                                               |                    |                        |        |       |                            |        |
|                                                                                                                                         | Observed<br>Coeff. | Bootstrap<br>Std. Err. | z      | p>  z | 95% Confidence<br>Interval |        |
| Condition                                                                                                                               |                    |                        |        |       |                            |        |
| QC                                                                                                                                      | 0.193              | 0.341                  | 0.570  | 0.572 | -0.476                     | 0.861  |
| EC                                                                                                                                      | 0.435              | 0.356                  | 1.220  | 0.222 | -0.263                     | 1.134  |
|                                                                                                                                         |                    |                        |        |       |                            |        |
| Trump-Activated Positive<br>Emotions (1=Yes)                                                                                            | 1.439              | 0.320                  | 4.500  | 0.000 | 0.813                      | 2.066  |
| Republican Identity: Strong                                                                                                             | 0.914              | 0.340                  | 2.690  | 0.007 | 0.247                      | 1.580  |
| Collusion: Own Opinion                                                                                                                  | -0.456             | 0.078                  | -5.860 | 0.000 | -0.608                     | -0.304 |
| Mueller Approval                                                                                                                        | -0.442             | 0.170                  | -2.610 | 0.009 | -0.774                     | -0.109 |
| Education                                                                                                                               | -0.116             | 0.123                  | -0.940 | 0.345 | -0.358                     | 0.125  |
| Female                                                                                                                                  | 0.240              | 0.303                  | 0.790  | 0.428 | -0.353                     | 0.833  |
| Age                                                                                                                                     | 0.019              | 0.011                  | 1.780  | 0.075 | -0.002                     | 0.039  |
| Twitter Weekly News<br>Consumption                                                                                                      | 0.246              | 0.066                  | 3.750  | 0.000 | 0.117                      | 0.375  |
| Constant                                                                                                                                | 6.196              | 0.895                  | 6.920  | 0.000 | 4.441                      | 7.951  |
|                                                                                                                                         |                    |                        |        |       |                            |        |
| var(e.Trump Warmth Rating)                                                                                                              | 4.392              | 0.418                  |        |       | 3.645                      | 5.292  |
|                                                                                                                                         |                    |                        |        |       |                            |        |
| Log pseudolikelihood                                                                                                                    | -651.265           |                        |        |       |                            |        |
| N                                                                                                                                       | 237                |                        |        |       |                            |        |
| Bootstrap Replications                                                                                                                  | 1000               |                        |        |       |                            |        |
| Note: Mediation results computed with the gsem command in Stata 14.                                                                     |                    |                        |        |       |                            |        |

| Table E-R2. Mediation Model: Experimental Conditions → Trump-Activated Positive Emotions → Trump Competence Rating (Republican-Only Sample) |                    |                        |        |       |                            |        |
|---------------------------------------------------------------------------------------------------------------------------------------------|--------------------|------------------------|--------|-------|----------------------------|--------|
| Dependent Variable: Trump-Activated Positive Emotions (Yes/No)                                                                              |                    |                        |        |       |                            |        |
| Logit Regression Results                                                                                                                    |                    |                        |        |       |                            |        |
|                                                                                                                                             | Observed<br>Coeff. | Bootstrap<br>Std. Err. | z      | p>  z | 95% Confidence<br>Interval |        |
| Condition                                                                                                                                   |                    |                        |        |       |                            |        |
| QC                                                                                                                                          | 0.382              | 0.390                  | 0.980  | 0.327 | -0.382                     | 1.145  |
| EC                                                                                                                                          | 0.786              | 0.399                  | 1.970  | 0.049 | 0.004                      | 1.567  |
|                                                                                                                                             |                    |                        |        |       |                            |        |
| Republican Identity: Strong                                                                                                                 | 0.376              | 0.367                  | 1.020  | 0.306 | -0.344                     | 1.096  |
| Collusion: Own Opinion                                                                                                                      | -0.150             | 0.082                  | -1.830 | 0.068 | -0.312                     | 0.011  |
| Mueller Approval                                                                                                                            | -0.323             | 0.175                  | -1.840 | 0.065 | -0.666                     | 0.020  |
| Education                                                                                                                                   | 0.052              | 0.131                  | 0.400  | 0.691 | -0.204                     | 0.308  |
| Female                                                                                                                                      | -0.629             | 0.336                  | -1.870 | 0.061 | -1.288                     | 0.029  |
| Age                                                                                                                                         | 0.021              | 0.013                  | 1.590  | 0.112 | -0.005                     | 0.046  |
| Twitter Weekly News Consumption                                                                                                             | 0.063              | 0.075                  | 0.830  | 0.405 | -0.085                     | 0.210  |
| Constant                                                                                                                                    | -0.328             | 0.907                  | -0.360 | 0.717 | -2.105                     | 1.448  |
|                                                                                                                                             |                    |                        |        |       |                            |        |
| Dependent Variable: Trump Competence Rating (0-10)                                                                                          |                    |                        |        |       |                            |        |
| Linear Regression Results                                                                                                                   |                    |                        |        |       |                            |        |
|                                                                                                                                             | Observed<br>Coeff. | Bootstrap<br>Std. Err. | z      | p>  z | 95% Confidence<br>Interval |        |
| Condition                                                                                                                                   |                    |                        |        |       |                            |        |
| QC                                                                                                                                          | 0.026              | 0.369                  | 0.070  | 0.944 | -0.698                     | 0.750  |
| EC                                                                                                                                          | 0.202              | 0.357                  | 0.570  | 0.572 | -0.498                     | 0.903  |
|                                                                                                                                             |                    |                        |        |       |                            |        |
| Trump-Activated Positive Emotions (1=Yes)                                                                                                   | 1.416              | 0.302                  | 4.700  | 0.000 | 0.825                      | 2.008  |
| Republican Identity: Strong                                                                                                                 | 0.843              | 0.306                  | 2.760  | 0.006 | 0.244                      | 1.442  |
| Collusion: Own Opinion                                                                                                                      | -0.366             | 0.073                  | -5.030 | 0.000 | -0.509                     | -0.223 |
| Mueller Approval                                                                                                                            | -0.398             | 0.160                  | -2.490 | 0.013 | -0.711                     | -0.084 |
| Education                                                                                                                                   | -0.106             | 0.116                  | -0.920 | 0.358 | -0.333                     | 0.120  |
| Female                                                                                                                                      | 0.399              | 0.303                  | 1.320  | 0.188 | -0.195                     | 0.993  |
| Age                                                                                                                                         | 0.027              | 0.010                  | 2.840  | 0.004 | 0.009                      | 0.046  |
| Twitter Weekly News Consumption                                                                                                             | 0.178              | 0.062                  | 2.870  | 0.004 | 0.056                      | 0.299  |
| Constant                                                                                                                                    | 6.100              | 0.854                  | 7.140  | 0.000 | 4.426                      | 7.774  |
|                                                                                                                                             |                    |                        |        |       |                            |        |
| var(e.Trump Competence Rating)                                                                                                              | 4.391              | 0.431                  |        |       | 3.622                      | 5.323  |
|                                                                                                                                             |                    |                        |        |       |                            |        |
| Log pseudolikelihood                                                                                                                        | -651.227           |                        |        |       |                            |        |
| N                                                                                                                                           | 237                |                        |        |       |                            |        |
| Bootstrap Replications                                                                                                                      | 1000               |                        |        |       |                            |        |
| Note: Mediation results computed with the gsem command in Stata 14.                                                                         |                    |                        |        |       |                            |        |

## Appendix F. Article evaluations

| Table F-R1. Dependent Variable: “Article: Cannot/Can be trusted” (Republican-Only Sample) |                    |                        |        |       |                            |        |
|-------------------------------------------------------------------------------------------|--------------------|------------------------|--------|-------|----------------------------|--------|
|                                                                                           | Observed<br>Coeff. | Bootstrap<br>Std. Err. | Z      | p>  z | 95% Confidence<br>Interval |        |
| Condition                                                                                 |                    |                        |        |       |                            |        |
| QC                                                                                        | -0.824             | 0.396                  | -2.080 | 0.038 | -1.601                     | -0.047 |
| EC                                                                                        | 0.020              | 0.402                  | 0.050  | 0.960 | -0.767                     | 0.808  |
|                                                                                           |                    |                        |        |       |                            |        |
| Republican Identity: Strong                                                               | -0.404             | 0.382                  | -1.060 | 0.291 | -1.153                     | 0.345  |
| Collusion: Own Opinion                                                                    | 0.250              | 0.077                  | 3.230  | 0.001 | 0.098                      | 0.402  |
| Mueller Approval                                                                          | 0.623              | 0.198                  | 3.150  | 0.002 | 0.235                      | 1.012  |
| Education                                                                                 | 0.195              | 0.131                  | 1.490  | 0.136 | -0.061                     | 0.452  |
| Female                                                                                    | -0.670             | 0.364                  | -1.840 | 0.065 | -1.383                     | 0.043  |
| Age                                                                                       | -0.017             | 0.013                  | -1.250 | 0.213 | -0.043                     | 0.009  |
| Twitter Weekly News<br>Consumption                                                        | 0.047              | 0.075                  | 0.630  | 0.527 | -0.099                     | 0.194  |
| Constant                                                                                  | -1.940             | 0.999                  | -1.940 | 0.052 | -3.898                     | 0.017  |
|                                                                                           |                    |                        |        |       |                            |        |
| Wald chi <sup>2</sup> (9)                                                                 | 128.10             |                        |        |       |                            |        |
| Prob > chi <sup>2</sup>                                                                   | 0.000              |                        |        |       |                            |        |
| Adjusted R <sup>2</sup>                                                                   | 0.292              |                        |        |       |                            |        |
| N                                                                                         | 237                |                        |        |       |                            |        |
| Bootstrap Replications                                                                    | 1000               |                        |        |       |                            |        |
| Note: Linear regression results computed with Stata 14.                                   |                    |                        |        |       |                            |        |

| Predicted Margins for “Article: Cannot/Can be trusted” by Experimental Condition                |        |                           |        |       |                            |        |
|-------------------------------------------------------------------------------------------------|--------|---------------------------|--------|-------|----------------------------|--------|
|                                                                                                 | Margin | Delta-method<br>Std. Err. | z      | p>  z | 95% Confidence<br>Interval |        |
| Condition                                                                                       |        |                           |        |       |                            |        |
| PC                                                                                              | -0.019 | 0.275                     | -0.070 | 0.945 | -0.559                     | 0.521  |
| QC                                                                                              | -0.843 | 0.274                     | -3.080 | 0.002 | -1.380                     | -0.306 |
| EC                                                                                              | 0.001  | 0.284                     | 0.000  | 0.997 | -0.555                     | 0.558  |
| Note: Margins computed with Stata 14 with 1000 Bootstrap replications. N=237 (Republicans only) |        |                           |        |       |                            |        |

| Table F-R2. Dependent Variable: “Article: Opinionated/Factual” (Republican-Only Sample) |                    |                        |        |       |                            |       |
|-----------------------------------------------------------------------------------------|--------------------|------------------------|--------|-------|----------------------------|-------|
|                                                                                         | Observed<br>Coeff. | Bootstrap<br>Std. Err. | z      | p>  z | 95% Confidence<br>Interval |       |
| Condition                                                                               |                    |                        |        |       |                            |       |
| QC                                                                                      | -0.753             | 0.451                  | -1.670 | 0.095 | -1.637                     | 0.131 |
| EC                                                                                      | -0.108             | 0.445                  | -0.240 | 0.808 | -0.981                     | 0.765 |
|                                                                                         |                    |                        |        |       |                            |       |
| Republican Identity: Strong                                                             | -0.333             | 0.408                  | -0.820 | 0.414 | -1.133                     | 0.466 |
| Collusion: Own Opinion                                                                  | 0.284              | 0.092                  | 3.100  | 0.002 | 0.104                      | 0.463 |
| Mueller Approval                                                                        | 0.504              | 0.243                  | 2.070  | 0.038 | 0.027                      | 0.981 |
| Education                                                                               | 0.071              | 0.142                  | 0.500  | 0.617 | -0.207                     | 0.349 |
| Female                                                                                  | -0.461             | 0.403                  | -1.150 | 0.252 | -1.251                     | 0.328 |
| Age                                                                                     | -0.022             | 0.015                  | -1.490 | 0.137 | -0.051                     | 0.007 |
| Twitter Weekly News<br>Consumption                                                      | 0.092              | 0.092                  | 1.000  | 0.319 | -0.089                     | 0.273 |
| Constant                                                                                | -1.298             | 1.139                  | -1.140 | 0.254 | -3.531                     | 0.934 |
|                                                                                         |                    |                        |        |       |                            |       |
| Wald chi <sup>2</sup> (9)                                                               | 102.86             |                        |        |       |                            |       |
| Prob > chi <sup>2</sup>                                                                 | 0.000              |                        |        |       |                            |       |
| Adjusted R <sup>2</sup>                                                                 | 0.216              |                        |        |       |                            |       |
| N                                                                                       | 237                |                        |        |       |                            |       |
| Bootstrap Replications                                                                  | 1000               |                        |        |       |                            |       |
| Note: Linear regression results computed with Stata 14.                                 |                    |                        |        |       |                            |       |

| Predicted Margins for “Article: Opinionated/Factual” by Experimental Condition                  |        |                           |        |       |                            |        |
|-------------------------------------------------------------------------------------------------|--------|---------------------------|--------|-------|----------------------------|--------|
|                                                                                                 | Margin | Delta-method<br>Std. Err. | z      | p>  z | 95% Confidence<br>Interval |        |
| Condition                                                                                       |        |                           |        |       |                            |        |
| PC                                                                                              | -0.036 | 0.323                     | -0.110 | 0.912 | -0.668                     | 0.597  |
| QC                                                                                              | -0.789 | 0.307                     | -2.560 | 0.010 | -1.391                     | -0.186 |
| EC                                                                                              | -0.144 | 0.331                     | -0.430 | 0.664 | -0.792                     | 0.505  |
| Note: Margins computed with Stata 14 with 1000 Bootstrap replications. N=237 (Republicans only) |        |                           |        |       |                            |        |

| Table F-D0. Distribution of re-cut article evaluation variables for Democrats |                  |        |       |
|-------------------------------------------------------------------------------|------------------|--------|-------|
|                                                                               | Evaluation level |        |       |
|                                                                               | Low              | Medium | High  |
| <b>Article: Trusted</b>                                                       |                  |        |       |
| %                                                                             | 32.49            | 39.59  | 27.92 |
| N                                                                             | 64               | 78     | 55    |
| <b>Article: Factual</b>                                                       |                  |        |       |
| %                                                                             | 31.98            | 37.56  | 30.46 |
| N                                                                             | 63               | 74     | 60    |
| <b>Article: tells Full Story</b>                                              |                  |        |       |
| %                                                                             | 53.3             | 30.96  | 15.74 |
| N                                                                             | 105              | 61     | 31    |
| <b>Article: Accurate</b>                                                      |                  |        |       |
| %                                                                             | 29.44            | 41.12  | 29.44 |
| N                                                                             | 58               | 81     | 58    |
| <b>Article: Fair</b>                                                          |                  |        |       |
| %                                                                             | 29.44            | 36.55  | 34.01 |
| N                                                                             | 58               | 72     | 67    |

| Table F-D1. Dependent Variable: “Article: Trusted” (Democrat-Only Sample) |                          |                        |        |       |                            |       |
|---------------------------------------------------------------------------|--------------------------|------------------------|--------|-------|----------------------------|-------|
|                                                                           | Observed<br>Odd<br>Ratio | Bootstrap<br>Std. Err. | z      | p>  z | 95% Confidence<br>Interval |       |
| Condition                                                                 |                          |                        |        |       |                            |       |
| QC                                                                        | 0.536                    | 0.192                  | -1.750 | 0.081 | 0.266                      | 1.080 |
| EC                                                                        | 0.472                    | 0.195                  | -1.810 | 0.070 | 0.209                      | 1.063 |
|                                                                           |                          |                        |        |       |                            |       |
| Democrat Identity: Strong                                                 | 1.935                    | 0.648                  | 1.970  | 0.049 | 1.003                      | 3.731 |
| Collusion: Own Opinion                                                    | 1.090                    | 0.122                  | 0.780  | 0.438 | 0.876                      | 1.357 |
| Mueller Approval                                                          | 1.773                    | 0.452                  | 2.240  | 0.025 | 1.075                      | 2.923 |
| Education                                                                 | 1.251                    | 0.188                  | 1.480  | 0.138 | 0.931                      | 1.680 |
| Female                                                                    | 1.195                    | 0.390                  | 0.540  | 0.586 | 0.630                      | 2.266 |
| Age                                                                       | 1.007                    | 0.015                  | 0.490  | 0.624 | 0.979                      | 1.036 |
| Twitter Weekly News<br>Consumption                                        | 1.093                    | 0.070                  | 1.390  | 0.166 | 0.964                      | 1.240 |
|                                                                           |                          |                        |        |       |                            |       |
| Cut 1                                                                     | 3.486                    | 1.376                  |        |       | 0.789                      | 6.182 |
| Cut 2                                                                     | 5.450                    | 1.436                  |        |       | 2.636                      | 8.265 |
| Log likelihood                                                            | -173.707                 |                        |        |       |                            |       |
| Wald chi <sup>2</sup> (9)                                                 | 27.67                    |                        |        |       |                            |       |
| Prob > chi <sup>2</sup>                                                   | 0.001                    |                        |        |       |                            |       |
| Pseudo R <sup>2</sup>                                                     | 0.088                    |                        |        |       |                            |       |
| N                                                                         | 175                      |                        |        |       |                            |       |
| Bootstrap Replications                                                    | 1000                     |                        |        |       |                            |       |
| Note: Ordered logistic regression results computed with Stata 14.         |                          |                        |        |       |                            |       |

| Predicted Probabilities of “Article: Trusted” = Low, by Experimental Condition                |        |                           |       |       |                            |       |
|-----------------------------------------------------------------------------------------------|--------|---------------------------|-------|-------|----------------------------|-------|
|                                                                                               | Margin | Delta-method<br>Std. Err. | z     | p>  z | 95% Confidence<br>Interval |       |
| Condition                                                                                     |        |                           |       |       |                            |       |
| PC                                                                                            | 0.223  | 0.046                     | 4.860 | 0.000 | 0.133                      | 0.312 |
| QC                                                                                            | 0.329  | 0.049                     | 6.720 | 0.000 | 0.233                      | 0.425 |
| EC                                                                                            | 0.353  | 0.067                     | 5.300 | 0.000 | 0.223                      | 0.484 |
| Note: Margins computed with Stata 14 with 1000 Bootstrap replications. N=175 (Democrats only) |        |                           |       |       |                            |       |

| Predicted Probabilities of “Article: Trusted” = Medium, by Experimental Condition             |        |                           |        |       |                            |       |
|-----------------------------------------------------------------------------------------------|--------|---------------------------|--------|-------|----------------------------|-------|
|                                                                                               | Margin | Delta-method<br>Std. Err. | z      | p>  z | 95% Confidence<br>Interval |       |
| Condition                                                                                     |        |                           |        |       |                            |       |
| PC                                                                                            | 0.386  | 0.041                     | 9.460  | 0.000 | 0.306                      | 0.466 |
| QC                                                                                            | 0.401  | 0.039                     | 10.230 | 0.000 | 0.324                      | 0.478 |
| EC                                                                                            | 0.399  | 0.040                     | 9.860  | 0.000 | 0.320                      | 0.478 |
| Note: Margins computed with Stata 14 with 1000 Bootstrap replications. N=175 (Democrats only) |        |                           |        |       |                            |       |



| Predicted Probabilities of “Article: Trusted” = High, by Experimental Condition               |        |                           |       |       |                            |       |
|-----------------------------------------------------------------------------------------------|--------|---------------------------|-------|-------|----------------------------|-------|
|                                                                                               | Margin | Delta-method<br>Std. Err. | z     | p>  z | 95% Confidence<br>Interval |       |
| Condition                                                                                     |        |                           |       |       |                            |       |
| PC                                                                                            | 0.391  | 0.061                     | 6.460 | 0.000 | 0.273                      | 0.510 |
| QC                                                                                            | 0.270  | 0.047                     | 5.720 | 0.000 | 0.178                      | 0.362 |
| EC                                                                                            | 0.248  | 0.055                     | 4.490 | 0.000 | 0.140                      | 0.356 |
| Note: Margins computed with Stata 14 with 1000 Bootstrap replications. N=175 (Democrats only) |        |                           |       |       |                            |       |

| Table F-D2. Dependent Variable: “Article: Factual” (Democrat-Only Sample) |                          |                        |        |       |                            |       |
|---------------------------------------------------------------------------|--------------------------|------------------------|--------|-------|----------------------------|-------|
|                                                                           | Observed<br>Odd<br>Ratio | Bootstrap<br>Std. Err. | z      | p>  z | 95% Confidence<br>Interval |       |
| Condition                                                                 |                          |                        |        |       |                            |       |
| QC                                                                        | 0.536                    | 0.218                  | -1.530 | 0.126 | 0.241                      | 1.191 |
| EC                                                                        | 0.436                    | 0.181                  | -2.000 | 0.046 | 0.193                      | 0.984 |
|                                                                           |                          |                        |        |       |                            |       |
| Democrat Identity: Strong                                                 | 2.369                    | 0.834                  | 2.450  | 0.014 | 1.188                      | 4.725 |
| Collusion: Own Opinion                                                    | 1.081                    | 0.111                  | 0.760  | 0.447 | 0.885                      | 1.321 |
| Mueller Approval                                                          | 1.632                    | 0.392                  | 2.040  | 0.041 | 1.019                      | 2.612 |
| Education                                                                 | 1.029                    | 0.155                  | 0.190  | 0.851 | 0.766                      | 1.381 |
| Female                                                                    | 1.432                    | 0.473                  | 1.090  | 0.278 | 0.749                      | 2.737 |
| Age                                                                       | 1.011                    | 0.015                  | 0.720  | 0.472 | 0.982                      | 1.040 |
| Twitter Weekly News<br>Consumption                                        | 1.048                    | 0.067                  | 0.730  | 0.464 | 0.924                      | 1.188 |
|                                                                           |                          |                        |        |       |                            |       |
| Cut 1                                                                     | 2.579                    | 1.423                  |        |       | -0.209                     | 5.368 |
| Cut 2                                                                     | 4.485                    | 1.466                  |        |       | 1.611                      | 7.359 |
| Log likelihood                                                            | -175.853                 |                        |        |       |                            |       |
| Wald chi <sup>2</sup> (9)                                                 | 19.23                    |                        |        |       |                            |       |
| Prob > chi <sup>2</sup>                                                   | 0.023                    |                        |        |       |                            |       |
| Pseudo R <sup>2</sup>                                                     | 0.079                    |                        |        |       |                            |       |
| N                                                                         | 175                      |                        |        |       |                            |       |
| Bootstrap Replications                                                    | 1000                     |                        |        |       |                            |       |
| Note: Ordered logistic regression results computed with Stata 14.         |                          |                        |        |       |                            |       |

| Predicted Probabilities of “Article: Factual” = Low, by Experimental Condition                |        |                           |       |       |                            |       |
|-----------------------------------------------------------------------------------------------|--------|---------------------------|-------|-------|----------------------------|-------|
|                                                                                               | Margin | Delta-method<br>Std. Err. | z     | p>  z | 95% Confidence<br>Interval |       |
| Condition                                                                                     |        |                           |       |       |                            |       |
| PC                                                                                            | 0.217  | 0.051                     | 4.220 | 0.000 | 0.116                      | 0.318 |
| QC                                                                                            | 0.324  | 0.055                     | 5.930 | 0.000 | 0.217                      | 0.432 |
| EC                                                                                            | 0.365  | 0.060                     | 6.130 | 0.000 | 0.248                      | 0.482 |
| Note: Margins computed with Stata 14 with 1000 Bootstrap replications. N=175 (Democrats only) |        |                           |       |       |                            |       |

| Predicted Probabilities of “Article: Factual” = Medium, by Experimental Condition             |        |                           |       |       |                            |       |
|-----------------------------------------------------------------------------------------------|--------|---------------------------|-------|-------|----------------------------|-------|
|                                                                                               | Margin | Delta-method<br>Std. Err. | z     | p>  z | 95% Confidence<br>Interval |       |
| Condition                                                                                     |        |                           |       |       |                            |       |
| PC                                                                                            | 0.377  | 0.042                     | 9.020 | 0.000 | 0.295                      | 0.459 |
| QC                                                                                            | 0.394  | 0.040                     | 9.830 | 0.000 | 0.316                      | 0.473 |
| EC                                                                                            | 0.390  | 0.041                     | 9.480 | 0.000 | 0.309                      | 0.470 |
| Note: Margins computed with Stata 14 with 1000 Bootstrap replications. N=175 (Democrats only) |        |                           |       |       |                            |       |

| Predicted Probabilities of “Article: Factual” = High, by Experimental Condition               |        |                           |       |       |                            |       |
|-----------------------------------------------------------------------------------------------|--------|---------------------------|-------|-------|----------------------------|-------|
|                                                                                               | Margin | Delta-method<br>Std. Err. | z     | p>  z | 95% Confidence<br>Interval |       |
| Condition                                                                                     |        |                           |       |       |                            |       |
| PC                                                                                            | 0.405  | 0.068                     | 5.970 | 0.000 | 0.272                      | 0.538 |
| QC                                                                                            | 0.281  | 0.053                     | 5.350 | 0.000 | 0.178                      | 0.384 |
| EC                                                                                            | 0.245  | 0.048                     | 5.150 | 0.000 | 0.152                      | 0.338 |
| Note: Margins computed with Stata 14 with 1000 Bootstrap replications. N=175 (Democrats only) |        |                           |       |       |                            |       |

| Table F-D3. Dependent Variable: “Article: Tells Full Story” (Democrat-Only Sample) |                          |                        |        |       |                            |       |
|------------------------------------------------------------------------------------|--------------------------|------------------------|--------|-------|----------------------------|-------|
|                                                                                    | Observed<br>Odd<br>Ratio | Bootstrap<br>Std. Err. | z      | p>  z | 95% Confidence<br>Interval |       |
| Condition                                                                          |                          |                        |        |       |                            |       |
| QC                                                                                 | 0.378                    | 0.157                  | -2.340 | 0.019 | 0.168                      | 0.853 |
| EC                                                                                 | 0.397                    | 0.173                  | -2.120 | 0.034 | 0.169                      | 0.931 |
|                                                                                    |                          |                        |        |       |                            |       |
| Democrat Identity: Strong                                                          | 1.155                    | 0.448                  | 0.370  | 0.711 | 0.540                      | 2.470 |
| Collusion: Own Opinion                                                             | 0.923                    | 0.097                  | -0.760 | 0.446 | 0.751                      | 1.134 |
| Mueller Approval                                                                   | 2.408                    | 0.656                  | 3.220  | 0.001 | 1.411                      | 4.108 |
| Education                                                                          | 1.108                    | 0.194                  | 0.590  | 0.558 | 0.786                      | 1.562 |
| Female                                                                             | 0.850                    | 0.304                  | -0.450 | 0.650 | 0.421                      | 1.715 |
| Age                                                                                | 0.999                    | 0.014                  | -0.100 | 0.921 | 0.971                      | 1.027 |
| Twitter Weekly News<br>Consumption                                                 | 1.120                    | 0.071                  | 1.780  | 0.075 | 0.989                      | 1.268 |
|                                                                                    |                          |                        |        |       |                            |       |
| Cut 1                                                                              | 3.087                    | 1.341                  |        |       | 0.459                      | 5.714 |
| Cut 2                                                                              | 4.850                    | 1.380                  |        |       | 2.146                      | 7.555 |
| Log likelihood                                                                     | -162.584                 |                        |        |       |                            |       |
| Wald chi <sup>2</sup> (9)                                                          | 24.88                    |                        |        |       |                            |       |
| Prob > chi <sup>2</sup>                                                            | 0.003                    |                        |        |       |                            |       |
| Pseudo R <sup>2</sup>                                                              | 0.089                    |                        |        |       |                            |       |
| N                                                                                  | 175                      |                        |        |       |                            |       |
| Bootstrap Replications                                                             | 1000                     |                        |        |       |                            |       |
| Note: Ordered logistic regression results computed with Stata 14.                  |                          |                        |        |       |                            |       |

| Predicted Probabilities of “Article: Tells Full Story” = Low, by Experimental Condition       |        |                           |       |       |                            |       |
|-----------------------------------------------------------------------------------------------|--------|---------------------------|-------|-------|----------------------------|-------|
|                                                                                               | Margin | Delta-method<br>Std. Err. | z     | p>  z | 95% Confidence<br>Interval |       |
| Condition                                                                                     |        |                           |       |       |                            |       |
| PC                                                                                            | 0.362  | 0.064                     | 5.650 | 0.000 | 0.236                      | 0.488 |
| QC                                                                                            | 0.568  | 0.061                     | 9.300 | 0.000 | 0.448                      | 0.688 |
| EC                                                                                            | 0.558  | 0.062                     | 8.940 | 0.000 | 0.435                      | 0.680 |
| Note: Margins computed with Stata 14 with 1000 Bootstrap replications. N=175 (Democrats only) |        |                           |       |       |                            |       |

| Predicted Probabilities of “Article: Tells Full Story” = Medium, by Experimental Condition    |        |                           |       |       |                            |       |
|-----------------------------------------------------------------------------------------------|--------|---------------------------|-------|-------|----------------------------|-------|
|                                                                                               | Margin | Delta-method<br>Std. Err. | z     | p>  z | 95% Confidence<br>Interval |       |
| Condition                                                                                     |        |                           |       |       |                            |       |
| PC                                                                                            | 0.365  | 0.042                     | 8.710 | 0.000 | 0.283                      | 0.447 |
| QC                                                                                            | 0.300  | 0.043                     | 6.960 | 0.000 | 0.215                      | 0.384 |
| EC                                                                                            | 0.305  | 0.044                     | 7.000 | 0.000 | 0.220                      | 0.391 |
| Note: Margins computed with Stata 14 with 1000 Bootstrap replications. N=175 (Democrats only) |        |                           |       |       |                            |       |

| Predicted Probabilities of “Article: Tells Full Story” = High, by Experimental Condition      |        |                           |       |       |                            |       |
|-----------------------------------------------------------------------------------------------|--------|---------------------------|-------|-------|----------------------------|-------|
|                                                                                               | Margin | Delta-method<br>Std. Err. | z     | p>  z | 95% Confidence<br>Interval |       |
| Condition                                                                                     |        |                           |       |       |                            |       |
| PC                                                                                            | 0.273  | 0.064                     | 4.280 | 0.000 | 0.148                      | 0.398 |
| QC                                                                                            | 0.132  | 0.034                     | 3.870 | 0.000 | 0.065                      | 0.199 |
| EC                                                                                            | 0.137  | 0.035                     | 3.880 | 0.000 | 0.068                      | 0.207 |
| Note: Margins computed with Stata 14 with 1000 Bootstrap replications. N=175 (Democrats only) |        |                           |       |       |                            |       |

| Table F-D4. Dependent Variable: “Article: Accurate” (Democrat-Only Sample) |                          |                        |        |       |                            |       |
|----------------------------------------------------------------------------|--------------------------|------------------------|--------|-------|----------------------------|-------|
|                                                                            | Observed<br>Odd<br>Ratio | Bootstrap<br>Std. Err. | Z      | P>  z | 95% Confidence<br>Interval |       |
| Condition                                                                  |                          |                        |        |       |                            |       |
| QC                                                                         | 0.463                    | 0.177                  | -2.020 | 0.044 | 0.219                      | 0.978 |
| EC                                                                         | 0.478                    | 0.212                  | -1.660 | 0.096 | 0.201                      | 1.140 |
|                                                                            |                          |                        |        |       |                            |       |
| Democrat Identity: Strong                                                  | 2.335                    | 0.813                  | 2.440  | 0.015 | 1.181                      | 4.620 |
| Collusion: Own Opinion                                                     | 1.066                    | 0.111                  | 0.610  | 0.544 | 0.868                      | 1.308 |
| Mueller Approval                                                           | 1.919                    | 0.503                  | 2.480  | 0.013 | 1.147                      | 3.208 |
| Education                                                                  | 1.136                    | 0.169                  | 0.860  | 0.389 | 0.850                      | 1.520 |
| Female                                                                     | 1.115                    | 0.403                  | 0.300  | 0.764 | 0.549                      | 2.263 |
| Age                                                                        | 1.003                    | 0.016                  | 0.220  | 0.828 | 0.973                      | 1.034 |
| Twitter Weekly News<br>Consumption                                         | 1.124                    | 0.072                  | 1.830  | 0.067 | 0.992                      | 1.274 |
|                                                                            |                          |                        |        |       |                            |       |
| Cut 1                                                                      | 3.052                    | 1.452                  |        |       | 0.206                      | 5.899 |
| Cut 2                                                                      | 5.141                    | 1.514                  |        |       | 2.174                      | 8.109 |
| Log likelihood                                                             | -169.837                 |                        |        |       |                            |       |
| Wald chi <sup>2</sup> (9)                                                  | 28.75                    |                        |        |       |                            |       |
| Prob > chi <sup>2</sup>                                                    | 0.001                    |                        |        |       |                            |       |
| Pseudo R <sup>2</sup>                                                      | 0.105                    |                        |        |       |                            |       |
| N                                                                          | 175                      |                        |        |       |                            |       |
| Bootstrap Replications                                                     | 1000                     |                        |        |       |                            |       |
| Note: Ordered logistic regression results computed with Stata 14.          |                          |                        |        |       |                            |       |

| Predicted Probabilities of “Article: Accurate” = Low, by Experimental Condition               |        |                           |       |       |                            |       |
|-----------------------------------------------------------------------------------------------|--------|---------------------------|-------|-------|----------------------------|-------|
|                                                                                               | Margin | Delta-method<br>Std. Err. | z     | p>  z | 95% Confidence<br>Interval |       |
| Condition                                                                                     |        |                           |       |       |                            |       |
| PC                                                                                            | 0.196  | 0.042                     | 4.690 | 0.000 | 0.114                      | 0.278 |
| QC                                                                                            | 0.318  | 0.051                     | 6.270 | 0.000 | 0.218                      | 0.417 |
| EC                                                                                            | 0.312  | 0.064                     | 4.840 | 0.000 | 0.186                      | 0.438 |
| Note: Margins computed with Stata 14 with 1000 Bootstrap replications. N=175 (Democrats only) |        |                           |       |       |                            |       |

| Predicted Probabilities of “Article: Accurate” = Medium, by Experimental Condition            |        |                           |        |       |                            |       |
|-----------------------------------------------------------------------------------------------|--------|---------------------------|--------|-------|----------------------------|-------|
|                                                                                               | Margin | Delta-method<br>Std. Err. | z      | p>  z | 95% Confidence<br>Interval |       |
| Condition                                                                                     |        |                           |        |       |                            |       |
| PC                                                                                            | 0.387  | 0.041                     | 9.490  | 0.000 | 0.307                      | 0.468 |
| QC                                                                                            | 0.413  | 0.038                     | 10.800 | 0.000 | 0.338                      | 0.488 |
| EC                                                                                            | 0.413  | 0.038                     | 10.790 | 0.000 | 0.338                      | 0.488 |
| Note: Margins computed with Stata 14 with 1000 Bootstrap replications. N=175 (Democrats only) |        |                           |        |       |                            |       |

| Predicted Probabilities of “Article: Accurate” = High, by Experimental Condition              |        |                           |       |       |                            |       |
|-----------------------------------------------------------------------------------------------|--------|---------------------------|-------|-------|----------------------------|-------|
|                                                                                               | Margin | Delta-method<br>Std. Err. | z     | p>  z | 95% Confidence<br>Interval |       |
| Condition                                                                                     |        |                           |       |       |                            |       |
| PC                                                                                            | 0.416  | 0.061                     | 6.880 | 0.000 | 0.298                      | 0.535 |
| QC                                                                                            | 0.269  | 0.047                     | 5.670 | 0.000 | 0.176                      | 0.362 |
| EC                                                                                            | 0.275  | 0.061                     | 4.540 | 0.000 | 0.156                      | 0.393 |
| Note: Margins computed with Stata 14 with 1000 Bootstrap replications. N=175 (Democrats only) |        |                           |       |       |                            |       |

| Table F-D5. Dependent Variable: “Article: Fair” (Democrat-Only Sample) |                          |                        |        |       |                            |       |
|------------------------------------------------------------------------|--------------------------|------------------------|--------|-------|----------------------------|-------|
|                                                                        | Observed<br>Odd<br>Ratio | Bootstrap<br>Std. Err. | z      | p>  z | 95% Confidence<br>Interval |       |
| Condition                                                              |                          |                        |        |       |                            |       |
| QC                                                                     | 0.441                    | 0.176                  | -2.050 | 0.040 | 0.202                      | 0.964 |
| EC                                                                     | 0.543                    | 0.225                  | -1.480 | 0.140 | 0.241                      | 1.222 |
|                                                                        |                          |                        |        |       |                            |       |
| Democrat Identity: Strong                                              | 1.473                    | 0.488                  | 1.170  | 0.242 | 0.770                      | 2.820 |
| Collusion: Own Opinion                                                 | 1.155                    | 0.127                  | 1.310  | 0.190 | 0.931                      | 1.432 |
| Mueller Approval                                                       | 1.602                    | 0.412                  | 1.830  | 0.067 | 0.968                      | 2.651 |
| Education                                                              | 1.296                    | 0.213                  | 1.580  | 0.114 | 0.940                      | 1.788 |
| Female                                                                 | 1.264                    | 0.393                  | 0.760  | 0.450 | 0.688                      | 2.324 |
| Age                                                                    | 1.000                    | 0.013                  | 0.030  | 0.973 | 0.974                      | 1.027 |
| Twitter Weekly News<br>Consumption                                     | 1.071                    | 0.070                  | 1.060  | 0.291 | 0.943                      | 1.218 |
|                                                                        |                          |                        |        |       |                            |       |
| Cut 1                                                                  | 3.074                    | 1.470                  |        |       | 0.193                      | 5.955 |
| Cut 2                                                                  | 4.859                    | 1.553                  |        |       | 1.814                      | 7.903 |
| Log likelihood                                                         | -176.595                 |                        |        |       |                            |       |
| Wald chi <sup>2</sup> (9)                                              | 18.85                    |                        |        |       |                            |       |
| Prob > chi <sup>2</sup>                                                | 0.027                    |                        |        |       |                            |       |
| Pseudo R <sup>2</sup>                                                  | 0.075                    |                        |        |       |                            |       |
| N                                                                      | 175                      |                        |        |       |                            |       |
| Bootstrap Replications                                                 | 1000                     |                        |        |       |                            |       |
| Note: Ordered logistic regression results computed with Stata 14.      |                          |                        |        |       |                            |       |

| Predicted Probabilities of “Article: Fair” = Low, by Experimental Condition                   |        |                           |       |       |                            |       |
|-----------------------------------------------------------------------------------------------|--------|---------------------------|-------|-------|----------------------------|-------|
|                                                                                               | Margin | Delta-method<br>Std. Err. | z     | p>  z | 95% Confidence<br>Interval |       |
| Condition                                                                                     |        |                           |       |       |                            |       |
| PC                                                                                            | 0.192  | 0.048                     | 4.040 | 0.000 | 0.099                      | 0.285 |
| QC                                                                                            | 0.329  | 0.050                     | 6.610 | 0.000 | 0.231                      | 0.426 |
| EC                                                                                            | 0.290  | 0.054                     | 5.380 | 0.000 | 0.184                      | 0.396 |
| Note: Margins computed with Stata 14 with 1000 Bootstrap replications. N=175 (Democrats only) |        |                           |       |       |                            |       |

| Predicted Probabilities of “Article: Fair” = Medium, by Experimental Condition                |        |                           |       |       |                            |       |
|-----------------------------------------------------------------------------------------------|--------|---------------------------|-------|-------|----------------------------|-------|
|                                                                                               | Margin | Delta-method<br>Std. Err. | z     | p>  z | 95% Confidence<br>Interval |       |
| Condition                                                                                     |        |                           |       |       |                            |       |
| PC                                                                                            | 0.343  | 0.041                     | 8.300 | 0.000 | 0.262                      | 0.424 |
| QC                                                                                            | 0.378  | 0.039                     | 9.820 | 0.000 | 0.303                      | 0.454 |
| EC                                                                                            | 0.377  | 0.039                     | 9.750 | 0.000 | 0.301                      | 0.452 |
| Note: Margins computed with Stata 14 with 1000 Bootstrap replications. N=175 (Democrats only) |        |                           |       |       |                            |       |



| Predicted Probabilities of “Article: Fair” = High, by Experimental Condition                  |        |                           |       |       |                            |       |
|-----------------------------------------------------------------------------------------------|--------|---------------------------|-------|-------|----------------------------|-------|
|                                                                                               | Margin | Delta-method<br>Std. Err. | z     | p>  z | 95% Confidence<br>Interval |       |
| Condition                                                                                     |        |                           |       |       |                            |       |
| PC                                                                                            | 0.465  | 0.070                     | 6.660 | 0.000 | 0.328                      | 0.602 |
| QC                                                                                            | 0.293  | 0.050                     | 5.840 | 0.000 | 0.195                      | 0.391 |
| EC                                                                                            | 0.334  | 0.058                     | 5.740 | 0.000 | 0.220                      | 0.448 |
| Note: Margins computed with Stata 14 with 1000 Bootstrap replications. N=175 (Democrats only) |        |                           |       |       |                            |       |
